# Supplementary material for: Radiation Awareness for Endovascular Abdominal Aortic Aneurysm Repair in the Hybrid Operating Room. An Instant Patient Risk Chart for Daily Practice
Source: PubMed Central journal article supplement — J Endovasc Ther. 2017 Apr 10;24(3):425–34. doi: 10.1177/1526602817697188 (PMC5438080; doi:10.1177/1526602817697188), 2017-04-10
Supplement: 16-0311_de_Ruiter_supplemental_tables.pdf [file 16-0311_de_Ruiter_supplemental_tables.pdf]

**Radiation Awareness for Endovascular Abdominal Aortic Aneurysm Repair in the Hybrid Operating Room. Part I: An Instant Patient Risk Chart for Daily Practice.** Quirina M. de Ruiter et al.

**Supplemental Table S1. Methodology for Correcting Patient Radiation Dose Rates for the Prediction Models.**

|                             | Raw Data                   | Calculation                         | Baseline                                               | Maximum                                  | Step Size in the Models       |
|-----------------------------|----------------------------|-------------------------------------|--------------------------------------------------------|------------------------------------------|-------------------------------|
| Fluoroscopy Protocol        | Low, medium, normal        | $DR = FT_{run} / Dose_{run}$        | Low                                                    | Normal                                   | 1 step                        |
| DSA Protocols               | 2 fps                      | $DR = (Fr_{run} / Dose_{run}) * 2$  | 2 fps                                                  | 3 fps                                    | 1 step                        |
|                             | 3 fps                      | $DR = (Fr_{run} / Dose_{run}) * 3$  |                                                        |                                          |                               |
| Rotation, deg               | -90 to 0 to +90            | Absolute 0-90                       | 0 (AP)                                                 | 90 (LAO or RAO)                          | 30 LAO or RAO                 |
| Angulation, deg             | -35 to 0 to +35            | Absolute 0-40                       | 0 (AP)                                                 | 90 (cranial or caudal)                   | 30                            |
| BMI, kg/m <sup>2</sup>      | —                          | —                                   | 18                                                     | 42                                       | 5 points of BMI               |
| Field size, cm <sup>2</sup> | Top shutter – left shutter | Detector field size=1450–field size | 1450 (no collimation or magnification and maximum SID) | 0 (maximum collimation or magnification) | -300 to 0 cm <sup>2</sup>     |
| Air gap, cm                 | SID ranges from 90 to 120  | Air gap=120–SID                     | 120 (maximum SID)                                      | 90 (minimum SID)                         | -5 to 90 cm (minimum air gap) |

Abbreviations: AP, anteroposterior; BMI, body mass index; DR, dose rate; DSA, Digital subtraction angiography; Fr, frames; FT, fluoroscopy time; LAO, left anterior oblique; RAO, right anterior oblique; SID, source-to-image distance.

**Radiation Awareness for Endovascular Abdominal Aortic Aneurysm Repair in the Hybrid Operating Room. Part I: An Instant Patient Risk Chart for Daily Practice.** Quirina M. de Ruiter et al.

**Supplemental Table S2. Overall Radiation Dose Rates (DR<sub>AK</sub> and DR<sub>DAP</sub>) for Fluoroscopy and Digital Subtraction Angiography Without Correcting for Other Factors.<sup>a</sup>**

|                             | Fluoroscopy Protocol <sup>b</sup> |                          |                                         | DSA Protocol <sup>b</sup> |                          |                                         |
|-----------------------------|-----------------------------------|--------------------------|-----------------------------------------|---------------------------|--------------------------|-----------------------------------------|
|                             | Runs                              | DR <sub>AK</sub> , mGy/s | DR <sub>DAP</sub> , mGy <sup>2</sup> /s | Runs                      | DR <sub>AK</sub> , mGy/s | DR <sub>DAP</sub> , mGy <sup>2</sup> /s |
| Rotation, deg               |                                   |                          |                                         |                           |                          |                                         |
| AP (0–15)                   | 10623 (62.9)                      | 0.25±0.2                 | 62±51                                   | 441 (2.6)                 | 4.2±3                    | 1001±726                                |
| Oblique 15–30               | 2895 (17.1)                       | 0.45±0.35                | 89±84                                   | 242 (1.4)                 | 7.3±5.4                  | 1390±896                                |
| Oblique 30–45               | 997 (5.9)                         | 0.44±0.27                | 91±84                                   | 73 (0.4)                  | 9.2±4.4                  | 1944±1128                               |
| Oblique 45–60               | 193 (1.1)                         | 0.88±0.56                | 130±105                                 | 15 (0.1)                  | 18.6±5.1                 | 3895±1933                               |
| Oblique 60–75               | 326 (1.9)                         | 0.85±0.39                | 138±88                                  | 20 (0.1)                  | 14.4±2.3                 | 2764±1163                               |
| Lateral (75–90)             | 997 (5.9)                         | 0.75±0.42                | 114±81                                  | 67 (0.4)                  | 14.6±5.6                 | 2403±1218                               |
| Angulation, deg             |                                   |                          |                                         |                           |                          |                                         |
| AP (0–15)                   | 13553 (80.2)                      | 0.34±0.32                | 6.8±5.8                                 | 13553 (80.2)              | 69±60                    | 1244±946                                |
| Oblique 15–30               | 2367 (14)                         | 0.37±0.29                | 6.4±4.4                                 | 2367 (14)                 | 101±89                   | 1668±1149                               |
| Oblique 30–45               | 111 (0.7)                         | 0.61±0.46                | 11.6±5.1                                | 111 (0.7)                 | 153±130                  | 3005±1997                               |
| BMI, kg/m <sup>2</sup>      |                                   |                          |                                         |                           |                          |                                         |
| <20                         | 245 (1.5)                         | 0.1±0.05                 | 1.5±0.4                                 | 245 (1.5)                 | 23±12                    | 343±102                                 |
| 20–25                       | 6543 (38.7)                       | 0.28±0.25                | 5.3±4.4                                 | 6543 (38.7)               | 58±48                    | 1133±891                                |
| 25–30                       | 6319 (37.4)                       | 0.36±0.31                | 7.1±5.3                                 | 6319 (37.4)               | 76±71                    | 1414±1052                               |
| 30–35                       | 2518 (14.9)                       | 0.46±0.35                | 10.2±6.8                                | 2518 (14.9)               | 109±81                   | 2161±1289                               |
| >35                         | 406 (2.4)                         | 0.83±0.48                | 13.6±5.9                                | 406 (2.4)                 | 125±87                   | 2044±729                                |
| Field size, cm <sup>2</sup> |                                   |                          |                                         |                           |                          |                                         |
| 1200–1400                   | 679 (4)                           | 0.13±0.12                | 1.9±1.1                                 | 679 (4)                   | 67±63                    | 933±562                                 |
| 1000–1200                   | 1816 (10.8)                       | 0.18±0.15                | 3±2.2                                   | 1816 (10.8)               | 81±64                    | 1278±778                                |
| 800–1000                    | 2262 (13.4)                       | 0.27±0.25                | 4.7±4                                   | 2262 (13.4)               | 99±92                    | 1628±1399                               |
| 600–800                     | 3247 (19.2)                       | 0.31±0.27                | 6±4.5                                   | 3247 (19.2)               | 88±73                    | 1656±1120                               |

|         |             |           |          |             |        |           |
|---------|-------------|-----------|----------|-------------|--------|-----------|
| 400–600 | 3195 (18.9) | 0.34±0.3  | 7.4±5.6  | 3195 (18.9) | 72±64  | 1562±1216 |
| 200–400 | 3514 (20.8) | 0.46±0.35 | 9.1±5.4  | 3514 (20.8) | 59±45  | 1126±655  |
| 0–200   | 1318 (7.8)  | 0.63±0.38 | 13.4±6.3 | 1318 (7.8)  | 38±27  | 734±453   |
| SID, cm |             |           |          |             |        |           |
| 115–120 |             |           |          | 245 (1.5)   | 23±12  | 343±102   |
| 110–115 |             |           |          | 6543 (38.7) | 58±48  | 1133±891  |
| 105–110 |             |           |          | 6319 (37.4) | 76±71  | 1414±1052 |
| 100–105 |             |           |          | 2518 (14.9) | 109±81 | 2161±1289 |
| 90–100  |             |           |          | 406 (2.4)   | 125±87 | 2044±729  |

Abbreviations: AP, anteroposterior; BMI, body mass index; DSA, digital subtraction angiography; SID, source-to-image distance.

<sup>a</sup> Rotation, angulation, BMI, field size, and SID.

<sup>b</sup> Continuous data are presented as the means ± standard deviation; categorical data are given as the counts (percentage).

**Radiation Awareness for Endovascular Abdominal Aortic Aneurysm Repair in the Hybrid Operating Room. Part I: An Instant Patient Risk Chart for Daily Practice.** Quirina M. de Ruiter et al.

**Supplemental Table S3. Overall Radiation Dose Rates for Air Kerma (DR<sub>AK</sub>) for Fluoroscopy and Digital Subtraction Angiography With Correction for Other Factors.<sup>a</sup>**

|                             | Fluoroscopy Protocol <sup>b</sup> |                          |             |                          |             |                          | DSA Protocol <sup>b</sup> |                          |           |                          |
|-----------------------------|-----------------------------------|--------------------------|-------------|--------------------------|-------------|--------------------------|---------------------------|--------------------------|-----------|--------------------------|
|                             | Low                               |                          | Medium      |                          | Normal      |                          | 2 fps                     |                          | 3 fps     |                          |
| Rotation, deg               | Runs                              | DR <sub>AK</sub> , mGy/s | Runs        | DR <sub>AK</sub> , mGy/s | Runs        | DR <sub>AK</sub> , mGy/s | Runs                      | DR <sub>AK</sub> , mGy/s | Runs      | DR <sub>AK</sub> , mGy/s |
| AP (0–15)                   | 6649 (39.4)                       | 0.13±0.05                | 2464 (14.6) | 0.32±0.1                 | 1510 (8.9)  | 0.63±0.19                | 320 (1.9)                 | 3.6±2.4                  | 121 (0.7) | 5.7±3.9                  |
| Oblique 15–30               | 1259 (7.5)                        | 0.19±0.06                | 885 (5.2)   | 0.41±0.12                | 751 (4.4)   | 0.95±0.3                 | 153 (0.9)                 | 6±3.8                    | 89 (0.5)  | 9.7±6.8                  |
| Oblique 30–45               | 484 (2.9)                         | 0.23±0.05                | 381 (2.3)   | 0.52±0.12                | 132 (0.8)   | 0.98±0.24                | 56 (0.3)                  | 8.4±3.5                  | 17 (0.1)  | 11.6±5.9                 |
| Oblique 45–60               | 52 (0.3)                          | 0.27±0.05                | 79 (0.5)    | 0.68±0.07                | 62 (0.4)    | 1.64±0.09                | 5 (0)                     | 14.2±4.2                 | 10 (0.1)  | 20.8±4                   |
| Oblique 60–75               | 42 (0.2)                          | 0.28±0.02                | 201 (1.2)   | 0.72±0.06                | 83 (0.5)    | 1.44±0.2                 | 15 (0.1)                  | 13.2±1                   | 5 (0)     | 17.9±1.1                 |
| Lateral (75–90)             | 277 (1.6)                         | 0.28±0.03                | 513 (3)     | 0.73±0.07                | 207 (1.2)   | 1.45±0.2                 | 50 (0.3)                  | 12.2±3.8                 | 17 (0.1)  | 21.5±4.5                 |
| Angulation, deg             |                                   |                          |             |                          |             |                          |                           |                          |           |                          |
| AP (0–15)                   | 7312 (43.3)                       | 0.14±0.06                | 4024 (23.8) | 0.42±0.19                | 2217 (13.1) | 0.84±0.38                | 440 (2.6)                 | 5.8±4.4                  | 169 (1)   | 9.6±7.8                  |
| Oblique 15–30               | 1405 (8.3)                        | 0.2±0.06                 | 454 (2.7)   | 0.4±0.14                 | 508 (3)     | 0.82±0.26                | 149 (0.9)                 | 5.2±3.3                  | 84 (0.5)  | 8.5±5.3                  |
| Oblique 30–45               | 46 (0.3)                          | 0.24±0.04                | 45 (0.3)    | 0.61±0.11                | 20 (0.1)    | 1.47±0.29                | 10 (0.1)                  | 10.4±4.7                 | 6 (0)     | 13.7±5.4                 |
| BMI, kg/m <sup>2</sup>      |                                   |                          |             |                          |             |                          |                           |                          |           |                          |
| <20                         | 217 (1.3)                         | 0.09±0.02                | 28 (0.2)    | 0.23±0                   |             |                          | 10 (0.1)                  | 1.4±0.4                  | 4 (0)     | 1.6±0.4                  |
| 20–25                       | 4139 (24.5)                       | 0.15±0.06                | 1787 (10.6) | 0.41±0.2                 | 617 (3.7)   | 0.73±0.36                | 243 (1.4)                 | 5.1±4.3                  | 111 (0.7) | 5.6±4.6                  |
| 25–30                       | 3282 (19.4)                       | 0.15±0.06                | 1931 (11.4) | 0.42±0.17                | 1106 (6.5)  | 0.84±0.34                | 279 (1.7)                 | 6±4                      | 80 (0.5)  | 10.7±7.3                 |
| 30–35                       | 1040 (6.2)                        | 0.18±0.06                | 655 (3.9)   | 0.44±0.16                | 823 (4.9)   | 0.84±0.34                | 50 (0.3)                  | 5.4±3.3                  | 61 (0.4)  | 14±6.4                   |
| >35                         | 85 (0.5)                          | 0.2±0.04                 | 122 (0.7)   | 0.59±0.14                | 199 (1.2)   | 1.26±0.27                | 17 (0.1)                  | 11.9±4.4                 | 3 (0)     | 22.7±5.4                 |
| Field size, cm <sup>2</sup> |                                   |                          |             |                          |             |                          |                           |                          |           |                          |
| 1200–1400                   | 556 (3.3)                         | 0.09±0.03                | 79 (0.5)    | 0.16±0.04                | 44 (0.3)    | 0.55±0.13                | 33 (0.2)                  | 1.9±1.2                  | 6 (0)     | 2±0.8                    |
| 1000–1200                   | 1335 (7.9)                        | 0.11±0.03                | 292 (1.7)   | 0.25±0.08                | 189 (1.1)   | 0.53±0.17                | 62 (0.4)                  | 2.5±1.7                  | 14 (0.1)  | 5±3.1                    |

|          |             |           |            |           |           |           |           |          |          |          |
|----------|-------------|-----------|------------|-----------|-----------|-----------|-----------|----------|----------|----------|
| 800–1000 | 1365 (8.1)  | 0.13±0.05 | 498 (2.9)  | 0.33±0.12 | 399 (2.4) | 0.69±0.29 | 83 (0.5)  | 3.4±2.4  | 50 (0.3) | 6.7±5.2  |
| 600–800  | 1951 (11.6) | 0.16±0.06 | 645 (3.8)  | 0.35±0.17 | 651 (3.9) | 0.74±0.29 | 118 (0.7) | 5.1±3.5  | 84 (0.5) | 7.4±5.4  |
| 400–600  | 1712 (10.1) | 0.17±0.06 | 937 (5.5)  | 0.36±0.16 | 546 (3.2) | 0.84±0.35 | 115 (0.7) | 5.7±4    | 57 (0.3) | 10.8±6.7 |
| 200–400  | 1592 (9.4)  | 0.2±0.06  | 1299 (7.7) | 0.52±0.17 | 623 (3.7) | 0.99±0.38 | 142 (0.8) | 8.3±4.3  | 31 (0.2) | 12.8±8.1 |
| 0–200    | 252 (1.5)   | 0.21±0.04 | 773 (4.6)  | 0.54±0.12 | 293 (1.7) | 1.23±0.25 | 46 (0.3)  | 10.6±3.5 | 17 (0.1) | 20.9±5.9 |
| SID, cm  |             |           |            |           |           |           |           |          |          |          |
| 115–120  |             |           |            |           |           |           | 72 (0.4)  | 10.9±4.4 | 27 (0.2) | 17.9±6.2 |
| 110–115  |             |           |            |           |           |           | 85 (0.5)  | 7.7±4.4  | 31 (0.2) | 14.9±7.4 |
| 105–110  |             |           |            |           |           |           | 89 (0.5)  | 5.6±3.6  | 42 (0.2) | 8.9±4.8  |
| 100–105  |             |           |            |           |           |           | 213 (1.3) | 4.5±3.2  | 92 (0.5) | 8.5±6.5  |
| 90–100   |             |           |            |           |           |           | 140 (0.8) | 3.7±2.9  | 67 (0.4) | 4.6±3.6  |

Abbreviations: AP, anteroposterior; BMI, body mass index; DSA, digital subtraction angiography; fps, frames per second; SID, source-to-image distance.

<sup>a</sup> Rotation, angulation, BMI, field size, and SID.

<sup>b</sup> Continuous data are presented as the means ± standard deviation; categorical data are given as the counts (percentage).

**Radiation Awareness for Endovascular Abdominal Aortic Aneurysm Repair in the Hybrid Operating Room. Part I: An Instant Patient Risk Chart for Daily Practice.** Quirina M. de Ruiter et al.

**Supplemental Table S4. Overall Radiation Dose Rates for Dose Area Product (DR<sub>DAP</sub>) for Fluoroscopy and Digital Subtraction Angiography With Correction for Other Factors.<sup>a</sup>**

|                             | Protocol Fluoroscopy |                                              |             |                                              |             |                                              | Protocol DSA |                                              |           |                                              |
|-----------------------------|----------------------|----------------------------------------------|-------------|----------------------------------------------|-------------|----------------------------------------------|--------------|----------------------------------------------|-----------|----------------------------------------------|
|                             | Low                  |                                              | Medium      |                                              | Normal      |                                              | 2 fps        |                                              | 3 fps     |                                              |
|                             | Runs                 | DR <sub>DAP</sub> ,<br>mGycm <sup>2</sup> /s | Runs        | DR <sub>DAP</sub> ,<br>mGycm <sup>2</sup> /s | Runs        | DR <sub>DAP</sub> ,<br>mGycm <sup>2</sup> /s | Runs         | DR <sub>DAP</sub> ,<br>mGycm <sup>2</sup> /s | Runs      | DR <sub>DAP</sub> ,<br>mGycm <sup>2</sup> /s |
| Rotation, deg               |                      |                                              |             |                                              |             |                                              |              |                                              |           |                                              |
| AP (0–15)                   | 6649 (39.4)          | 38±15                                        | 2464 (14.6) | 67±31                                        | 1510 (8.9)  | 156±67                                       | 320 (1.9)    | 827±469                                      | 121 (0.7) | 1460±1026                                    |
| Oblique 15–30               | 1259 (7.5)           | 42±17                                        | 885 (5.2)   | 71±40                                        | 751 (4.4)   | 188±104                                      | 153 (0.9)    | 1241±912                                     | 89 (0.5)  | 1645±813                                     |
| Oblique 30–45               | 484 (2.9)            | 55±22                                        | 381 (2.3)   | 82±57                                        | 132 (0.8)   | 248±114                                      | 56 (0.3)     | 1730±934                                     | 17 (0.1)  | 2647±1430                                    |
| Oblique 45–60               | 52 (0.3)             | 62±19                                        | 79 (0.5)    | 123±79                                       | 62 (0.4)    | 195±135                                      | 5 (0)        | 2295±774                                     | 10 (0.1)  | 4694±1847                                    |
| Oblique 60–75               | 42 (0.2)             | 39±16                                        | 201 (1.2)   | 112±47                                       | 83 (0.5)    | 252±75                                       | 15 (0.1)     | 2217±640                                     | 5 (0)     | 4406±704                                     |
| Lateral (75–90)             | 277 (1.6)            | 54±27                                        | 513 (3)     | 103±50                                       | 207 (1.2)   | 222±90                                       | 50 (0.3)     | 1939±788                                     | 17 (0.1)  | 3768±1250                                    |
| Angulation, deg             |                      |                                              |             |                                              |             |                                              |              |                                              |           |                                              |
| AP (0–15)                   | 7312 (43.3)          | 39±17                                        | 4024 (23.8) | 71±38                                        | 2217 (13.1) | 165±80                                       | 440 (2.6)    | 1056±733                                     | 169 (1)   | 1734±1224                                    |
| Oblique 15–30               | 1405 (8.3)           | 50±17                                        | 454 (2.7)   | 119±50                                       | 508 (3)     | 225±104                                      | 149 (0.9)    | 1386±888                                     | 84 (0.5)  | 2168±1374                                    |
| Oblique 30–45               | 46 (0.3)             | 52±19                                        | 45 (0.3)    | 148±39                                       | 20 (0.1)    | 396±78                                       | 10 (0.1)     | 2222±1291                                    | 6 (0)     | 4310±2386                                    |
| BMI, kg/m <sup>2</sup>      |                      |                                              |             |                                              |             |                                              |              |                                              |           |                                              |
| <20                         | 217 (1.3)            | 20±8                                         | 28 (0.2)    | 48±1                                         |             |                                              | 10 (0.1)     | 344±83                                       | 4 (0)     | 340±155                                      |
| 20–25                       | 4139 (24.5)          | 38±16                                        | 1787 (10.6) | 72±42                                        | 617 (3.7)   | 153±72                                       | 243 (1.4)    | 962±689                                      | 111 (0.7) | 1507±1140                                    |
| 25–30                       | 3282 (19.4)          | 41±17                                        | 1931 (11.4) | 75±42                                        | 1106 (6.5)  | 179±103                                      | 279 (1.7)    | 1244±851                                     | 80 (0.5)  | 2008±1416                                    |
| 30–35                       | 1040 (6.2)           | 52±16                                        | 655 (3.9)   | 92±43                                        | 823 (4.9)   | 194±81                                       | 50 (0.3)     | 1509±818                                     | 61 (0.4)  | 2695±1361                                    |
| >35                         | 85 (0.5)             | 40±22                                        | 122 (0.7)   | 86±42                                        | 199 (1.2)   | 186±79                                       | 17 (0.1)     | 1967±657                                     | 3 (0)     | 2479±1119                                    |
| Field size, cm <sup>2</sup> |                      |                                              |             |                                              |             |                                              |              |                                              |           |                                              |
| 1200–1400                   | 556 (3.3)            | 47±14                                        | 79 (0.5)    | 84±20                                        | 44 (0.3)    | 285±69                                       | 33 (0.2)     | 947±608                                      | 6 (0)     | 855±171                                      |
| 1000–1200                   | 1335 (7.9)           | 53±13                                        | 292 (1.7)   | 111±29                                       | 189 (1.1)   | 232±81                                       | 62 (0.4)     | 1105±716                                     | 14 (0.1)  | 2046±557                                     |
| 800–1000                    | 1365 (8.1)           | 47±19                                        | 498 (2.9)   | 118±46                                       | 399 (2.4)   | 256±100                                      | 83 (0.5)     | 1243±917                                     | 50 (0.3)  | 2267±1789                                    |

|         |             |       |            |        |           |        |           |           |          |           |
|---------|-------------|-------|------------|--------|-----------|--------|-----------|-----------|----------|-----------|
| 600–800 | 1951 (11.6) | 46±15 | 645 (3.8)  | 101±48 | 651 (3.9) | 202±71 | 118 (0.7) | 1465±990  | 84 (0.5) | 1925±1236 |
| 400–600 | 1712 (10.1) | 35±12 | 937 (5.5)  | 76±36  | 546 (3.2) | 178±78 | 115 (0.7) | 1226±855  | 57 (0.3) | 2240±1526 |
| 200–400 | 1592 (9.4)  | 26±9  | 1299 (7.7) | 66±24  | 623 (3.7) | 129±44 | 142 (0.8) | 1054±574  | 31 (0.2) | 1453±882  |
| 0–200   | 252 (1.5)   | 14±5  | 773 (4.6)  | 32±15  | 293 (1.7) | 72±32  | 46 (0.3)  | 580±287   | 17 (0.1) | 1151±556  |
| SID, cm |             |       |            |        |           |        |           |           |          |           |
| 115–120 |             |       |            |        |           |        | 72 (0.4)  | 1841±804  | 27 (0.2) | 3468±1277 |
| 110–115 |             |       |            |        |           |        | 85 (0.5)  | 1657±1070 | 31 (0.2) | 3172±1934 |
| 105–110 |             |       |            |        |           |        | 89 (0.5)  | 1183±740  | 42 (0.2) | 1763±689  |
| 100–105 |             |       |            |        |           |        | 213 (1.3) | 910±552   | 92 (0.5) | 1722±1119 |
| 90–100  |             |       |            |        |           |        | 140 (0.8) | 862±636   | 67 (0.4) | 1144±739  |

Abbreviations: AP, anteroposterior; BMI, body mass index; DSA, digital subtraction angiography; fps, frames per second; SID, source-to-image distance.

<sup>a</sup> Rotation, angulation, BMI, field size, and SID.

<sup>b</sup> Continuous data are presented as the means ± standard deviation; categorical data are given as the counts (percentage).

**Radiation Awareness for Endovascular Abdominal Aortic Aneurysm Repair in the Hybrid Operating Room. Part I: An Instant Patient Risk Chart for Daily Practice.** Quirina M. de Ruiter et al.

**Supplemental Table S5.** Univariate Outcomes.<sup>a</sup>

| Dose Rate Model                          | Air Kerma                          | Dose Area Product                  |
|------------------------------------------|------------------------------------|------------------------------------|
| Fluoroscopy                              |                                    |                                    |
| Protocol: low to medium                  | 2.48 (2.45 to 2.52), p<0.001       | 1.78 (1.75 to 1.81), p<0.001       |
| Protocol: low to normal                  | 4.89 (4.81 to 4.99), p<0.001; 0.81 | 3.7 (3.61 to 3.79), p<0.001; 0.65  |
| Rotation (+30 deg)                       | 1.59 (1.57 to 1.61), p<0.001; 0.56 | 1.3 (1.29 to 1.32), p<0.001; 0.41  |
| Angulation (+30 deg)                     | 2.12 (2.04 to 2.21), p<0.001; 0.43 | 1.9 (1.83 to 1.98), p<0.001; 0.39  |
| BMI (+5 points)                          | 1.58 (1.36 to 1.83), p<0.001; 0.39 | 1.5 (1.33 to 1.72), p<0.001; 0.35  |
| Irradiated field (−200 cm <sup>2</sup> ) | 1.39 (1.37 to 1.4), p<0.001; 0.53  | 0.82 (0.81 to 0.83), p<0.001; 0.41 |
| DSA                                      |                                    |                                    |
| Protocol: 2 fps to 3 fps                 | 1.77 (1.6 to 1.97), p<0.001; 0.56  | 1.78 (1.61 to 1.97), p<0.001; 0.51 |
| Rotation (+30 deg)                       | 1.75 (1.68 to 1.82), p<0.001; 0.75 | 1.52 (1.46 to 1.58), p<0.001; 0.63 |
| Angulation (+30 deg)                     | 2.06 (1.76 to 2.44), p<0.001; 0.55 | 2.01 (1.72 to 2.32), p<0.001; 0.50 |
| BMI (+5 points)                          | 1.68 (1.42 to 1.96), p<0.001; 0.49 | 1.58 (1.38 to 1.78), p<0.001; 0.43 |
| Irradiated field (−200 cm <sup>2</sup> ) | 1.50 (1.45 to 1.56), p<0.001; 0.70 | 0.88 (0.85 to 0.92), p<0.001; 0.46 |
| Air gap (−5 cm)                          | 0.72 (0.7 to 0.74), p<0.001; 0.71  | 0.76 (0.74 to 0.78), p<0.001; 0.63 |

Abbreviations: BMI, body mass index; DSA, digital subtraction angiography;

<sup>a</sup> Data are presented as the odds ratio (95% confidence interval), p value; coefficient of multiple determination.
